# Supplementary material for: Consistent interpretation of isotope and chemical oxygen exchange relaxation kinetics in SrFe0.85Mo0.15O3−δ ferrite
Source: Royal Society of Chemistry journal article supplement (doi:10.1039/d3cp05441a), 2024-01-01
Supplement: d3cp05441a1.pdf [file d3cp05441a1.pdf]

Electronic Supplementary Material (ESI) for Physical Chemistry Chemical Physics

*Electronic Supporting Information*

**Consistent interpretation of isotope and chemical oxygen exchange  
relaxation kinetics in  $\text{SrFe}_{0.85}\text{Mo}_{0.15}\text{O}_{3-\delta}$  ferrite**

M. Arapova<sup>\*,a</sup>, S. Chizhik<sup>a</sup>, O. Bragina<sup>a</sup>, R. Guskov<sup>a</sup>, V. Sobolev<sup>b</sup> and A. Nemudry<sup>a</sup>

<sup>a</sup> *Institute of Solid State Chemistry and Mechanochemistry, SB RAS, Kutateladze 18, Novosibirsk, Russia, 630090.*

<sup>b</sup> *Boriskov Institute of Catalysis, SB RAS, Lavrentieva 5, Novosibirsk, Russia, 630090*

\* Corresponding author. Email: arapova@solid.

Table S1. Experiment parameters

|      | Flow         | Reactor                                 | T, °C   | $p_{O_2}$ , atm           |
|------|--------------|-----------------------------------------|---------|---------------------------|
| QEOR | 50 ml/min    | Tubular quartz, 4 mm inner diameter     | 600-900 | $10^{-5}$ -0.2            |
| OPPR | 10-45 ml/min | Tubular quartz, 4 mm inner diameter     | 650-850 | $10^{-3}$ - $10^{-1}$ atm |
| IE   | static       | cylindrical reactor, 15 cm <sup>3</sup> | 600-640 |                           |

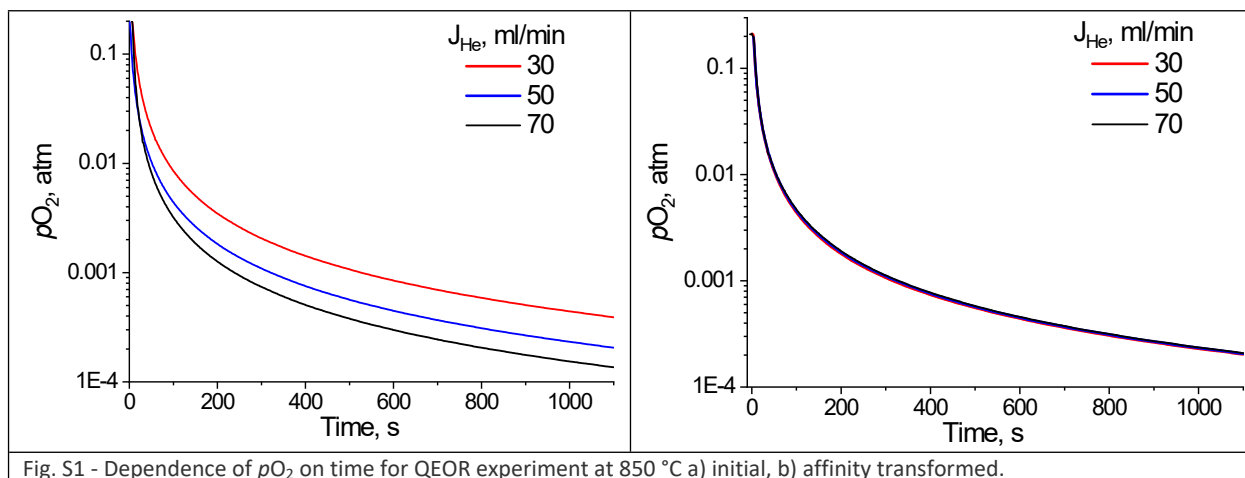

Fig. S1 - Dependence of  $p_{O_2}$  on time for QEOR experiment at 850 °C a) initial, b) affinity transformed.

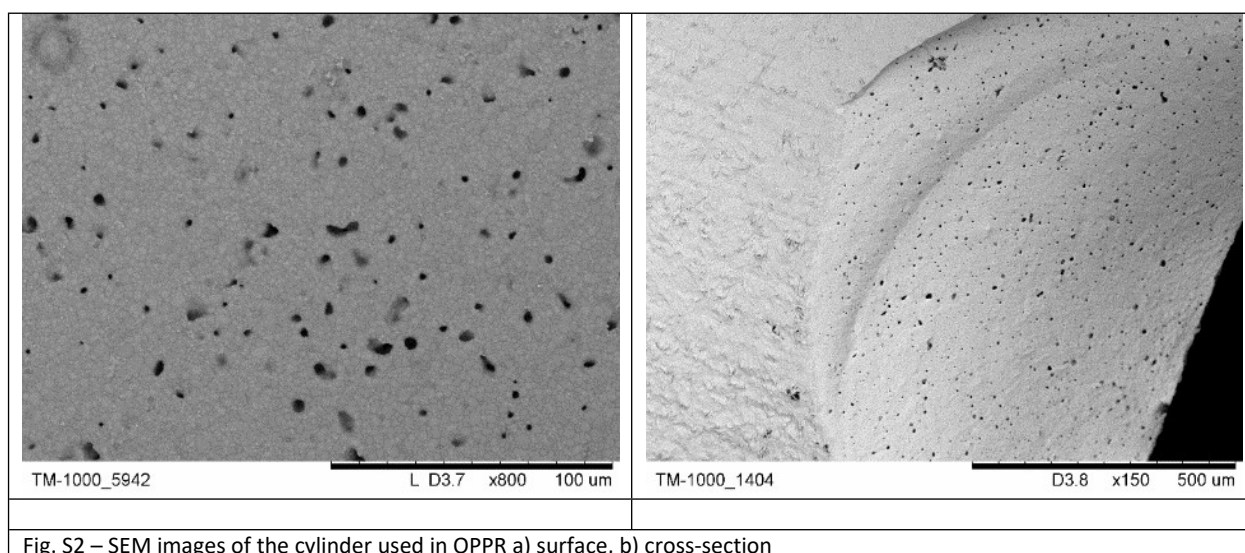

Fig. S2 – SEM images of the cylinder used in OPPr a) surface, b) cross-section

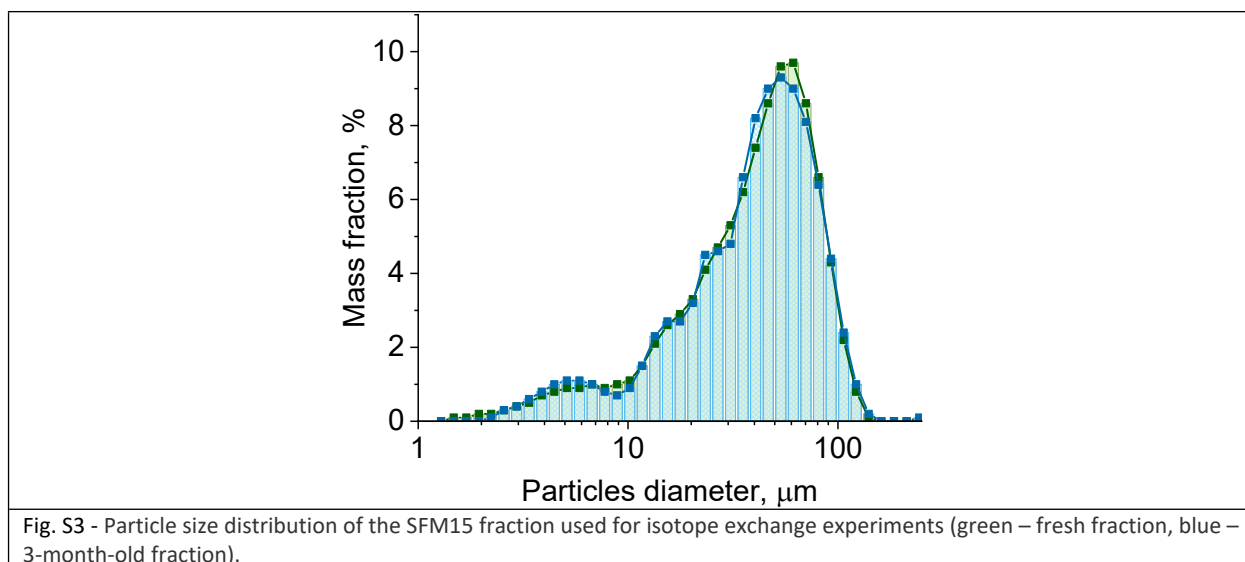

Fig. S3 - Particle size distribution of the SFM15 fraction used for isotope exchange experiments (green – fresh fraction, blue – 3-month-old fraction).

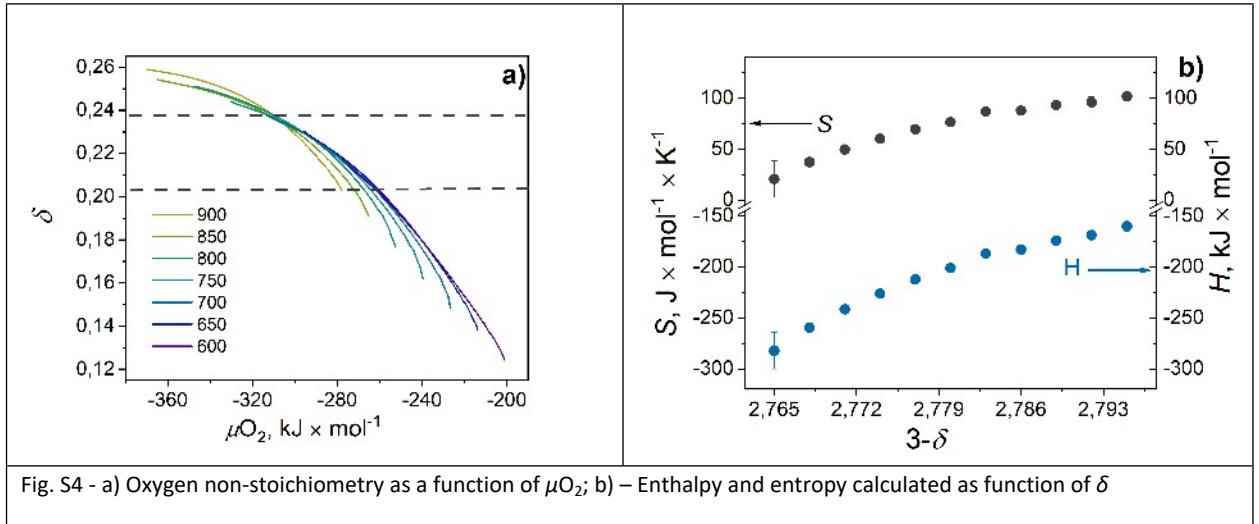

Table S2. Experimental and modeling error details

| Step    | J  | $p_{des}^0$ | $p_{ads}^0$ | $\chi^2_{normal}$ | $R_{factor}$ | $R_{00}$ | $\pm Er(R_{00})$ | $D_{chem}$ | $\pm Er(D)$ |
|---------|----|-------------|-------------|-------------------|--------------|----------|------------------|------------|-------------|
| 850     |    |             |             |                   |              |          |                  |            |             |
| 7/5     | 25 | 0.06892     | 0.04842     | 3.29E-5           | 0.99998      | 1.56E-06 | 1.67E-08         | 2.80E-05   | 1.97E-07    |
| 3/2     | 25 | 0.02835     | 0.01848     | 1.65E-5           | 0.99999      | 1.40E-06 | 3.83E-09         | 2.15E-05   | 8.02E-08    |
| 1.5/1   | 25 | 0.01354     | 0.0087      | 4.05E-5           | 0.99998      | 1.42E-06 | 1.89E-09         | 1.87E-05   | 2.65E-08    |
| 0.7/0.5 | 35 | 0.00664     | 0.00467     | 5.3E-5            | 0.99997      | 1.37E-06 | 5.73E-09         | 1.65E-05   | 1.72E-07    |
| 0.3/0.2 | 45 | 0.00279     | 0.00182     | 5.99E-5           | 0.99997      | 1.25E-06 | 4.58E-09         | 1.29E-05   | 2.59E-07    |
| 800     |    |             |             |                   |              |          |                  |            |             |
| 7/5     | 20 | 0.06737     | 0.0477      | 2.05E-5           | 0.99999      | 1.00E-06 | 8.25E-09         | 1.92E-05   | 1.01E-07    |
| 3/2     | 25 | 0.02878     | 0.01902     | 3.17E-5           | 0.99998      | 1.06E-06 | 5.64E-09         | 1.52E-05   | 9.66E-08    |
| 1.5/1   | 25 | 0.0141      | 0.00933     | 1.94E-5           | 0.99999      | 1.02E-06 | 2.85E-09         | 1.34E-05   | 5.23E-08    |
| 0.7/0.5 | 35 | 0.00661     | 0.00468     | 8.08E-5           | 0.99996      | 9.53E-07 | 4.22E-09         | 1.12E-05   | 1.09E-07    |
| 0.3/0.2 | 45 | 0.00279     | 0.00184     | 9.23E-5           | 0.99995      | 9.22E-07 | 3.00E-09         | 8.15E-06   | 8.48E-08    |
| 750     |    |             |             |                   |              |          |                  |            |             |
| 7/5     | 15 | 0.06451     | 0.0458      | 1.05E-5           | 0.99999      | 6.30E-07 | 2.10E-09         | 1.07E-05   | 5.47E-08    |
| 3/2     | 25 | 0.02886     | 0.01906     | 1.37E-5           | 0.99999      | 6.13E-07 | 2.05E-09         | 9.11E-06   | 4.77E-08    |
| 1.5/1   | 25 | 0.01411     | 0.00933     | 2.24E-5           | 0.99999      | 6.01E-07 | 1.59E-09         | 7.71E-06   | 3.79E-08    |
| 0.7/0.5 | 35 | 0.00665     | 0.00466     | 4.49E-5           | 0.99998      | 6.07E-07 | 1.71E-09         | 7.13E-06   | 5.34E-08    |
| 0.3/0.2 | 40 | 0.00281     | 0.00181     | 1.23E-4           | 0.99994      | 5.68E-07 | 2.19E-09         | 5.12E-06   | 8.35E-08    |
| 700     |    |             |             |                   |              |          |                  |            |             |
| 7/5     | 10 | 0.06032     | 0.04272     | 3.51E-5           | 0.99998      | 3.65E-07 | 2.25E-09         | 7.05E-06   | 5.17E-08    |
| 3/2     | 20 | 0.02819     | 0.01871     | 1.37E-5           | 0.99999      | 3.26E-07 | 1.13E-09         | 6.12E-06   | 4.39E-08    |
| 1.5/1   | 20 | 0.01385     | 0.0092      | 4.07E-5           | 0.99998      | 3.09E-07 | 1.09E-09         | 4.70E-06   | 3.59E-08    |
| 0.7/0.5 | 25 | 0.00652     | 0.00462     | 2.82E-4           | 0.99986      | 2.89E-07 | 1.94E-09         | 3.92E-06   | 8.04E-08    |
| 0.3/0.2 | 25 | 0.00279     | 0.00187     | 2.59E-4           | 0.99987      | 3.04E-07 | 1.41E-09         | 3.29E-06   | 5.30E-08    |
| 650     |    |             |             |                   |              |          |                  |            |             |
| 7/5     | 10 | 0.06013     | 0.04281     | 5.22E-5           | 0.99997      | 1.33E-07 | 9.46E-10         | 3.60E-06   | 1.57E-08    |
| 3/2     | 10 | 0.02505     | 0.0167      | 6.01E-5           | 0.99997      | 1.31E-07 | 7.10E-10         | 3.05E-06   | 3.02E-08    |
| 1.5/1   | 15 | 0.01317     | 0.00877     | 1.08E-4           | 0.99995      | 1.26E-07 | 8.24E-10         | 2.51E-06   | 1.08E-07    |
| 0.7/0.5 | 15 | 0.00595     | 0.00435     | 3.07E-4           | 0.99985      | 1.25E-07 | 1.07E-09         | 2.22E-06   | 9.29E-08    |
| 0.3/0.2 | 15 | 0.0025      | 0.0018      | 0.00172           | 0.99914      | 1.25E-07 | 1.99E-09         | 1.84E-06   | 2.13E-07    |

\*J – total gas flow rate, ml/min;  $p_{des}^0$ ,  $p_{ads}^0$  – initial oxygen partial pressure at desorption and adsorption stage, atm;  $\chi^2_{normal}$  – normalized square of relative data description error;  $R_{factor}$  – measure of the disagreement between the modeled and observed amplitudes,  $R_{00} = R_0/p^n$  – pre-exponential factor of exchange rate constant;  $D_{chem}$  – chemical diffusion coefficient,  $cm^2 s^{-1}$

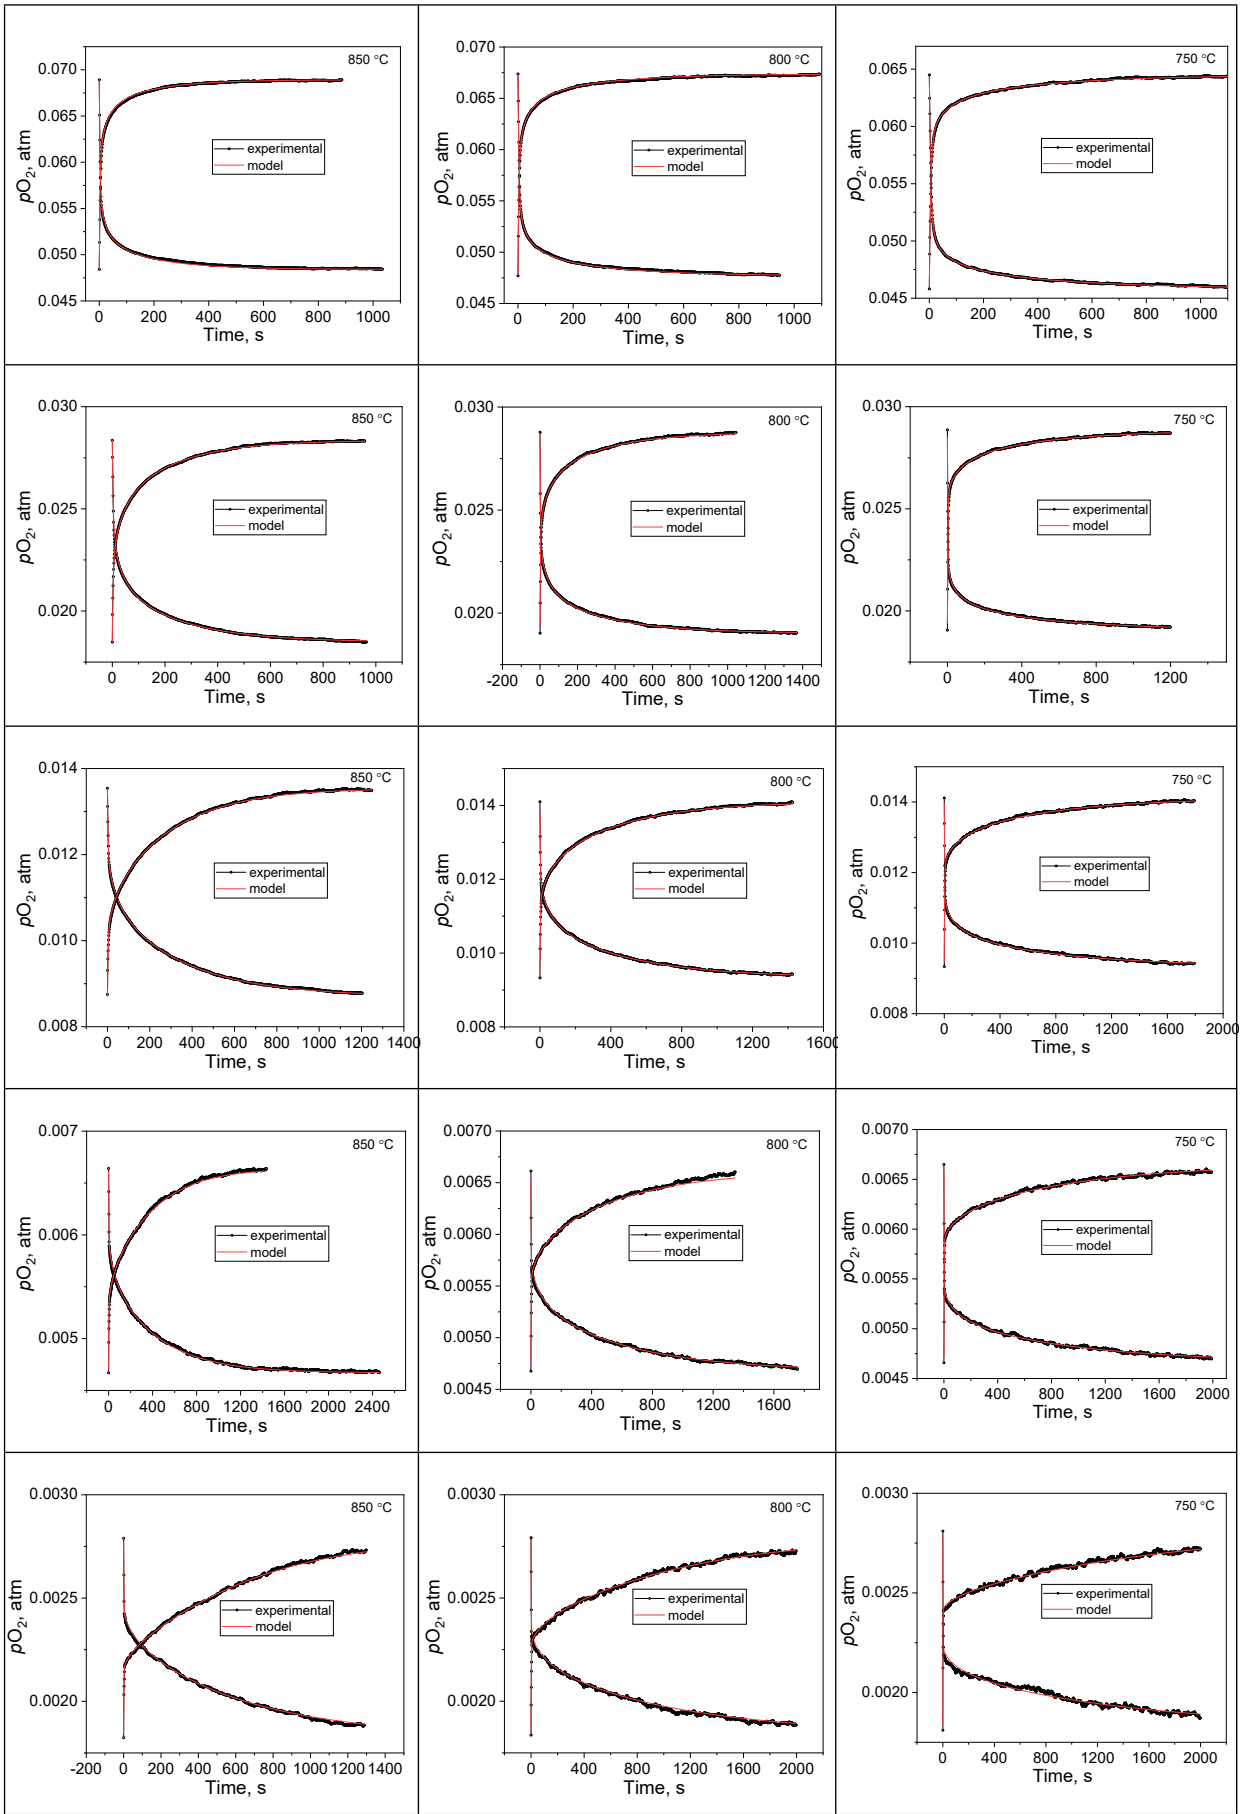



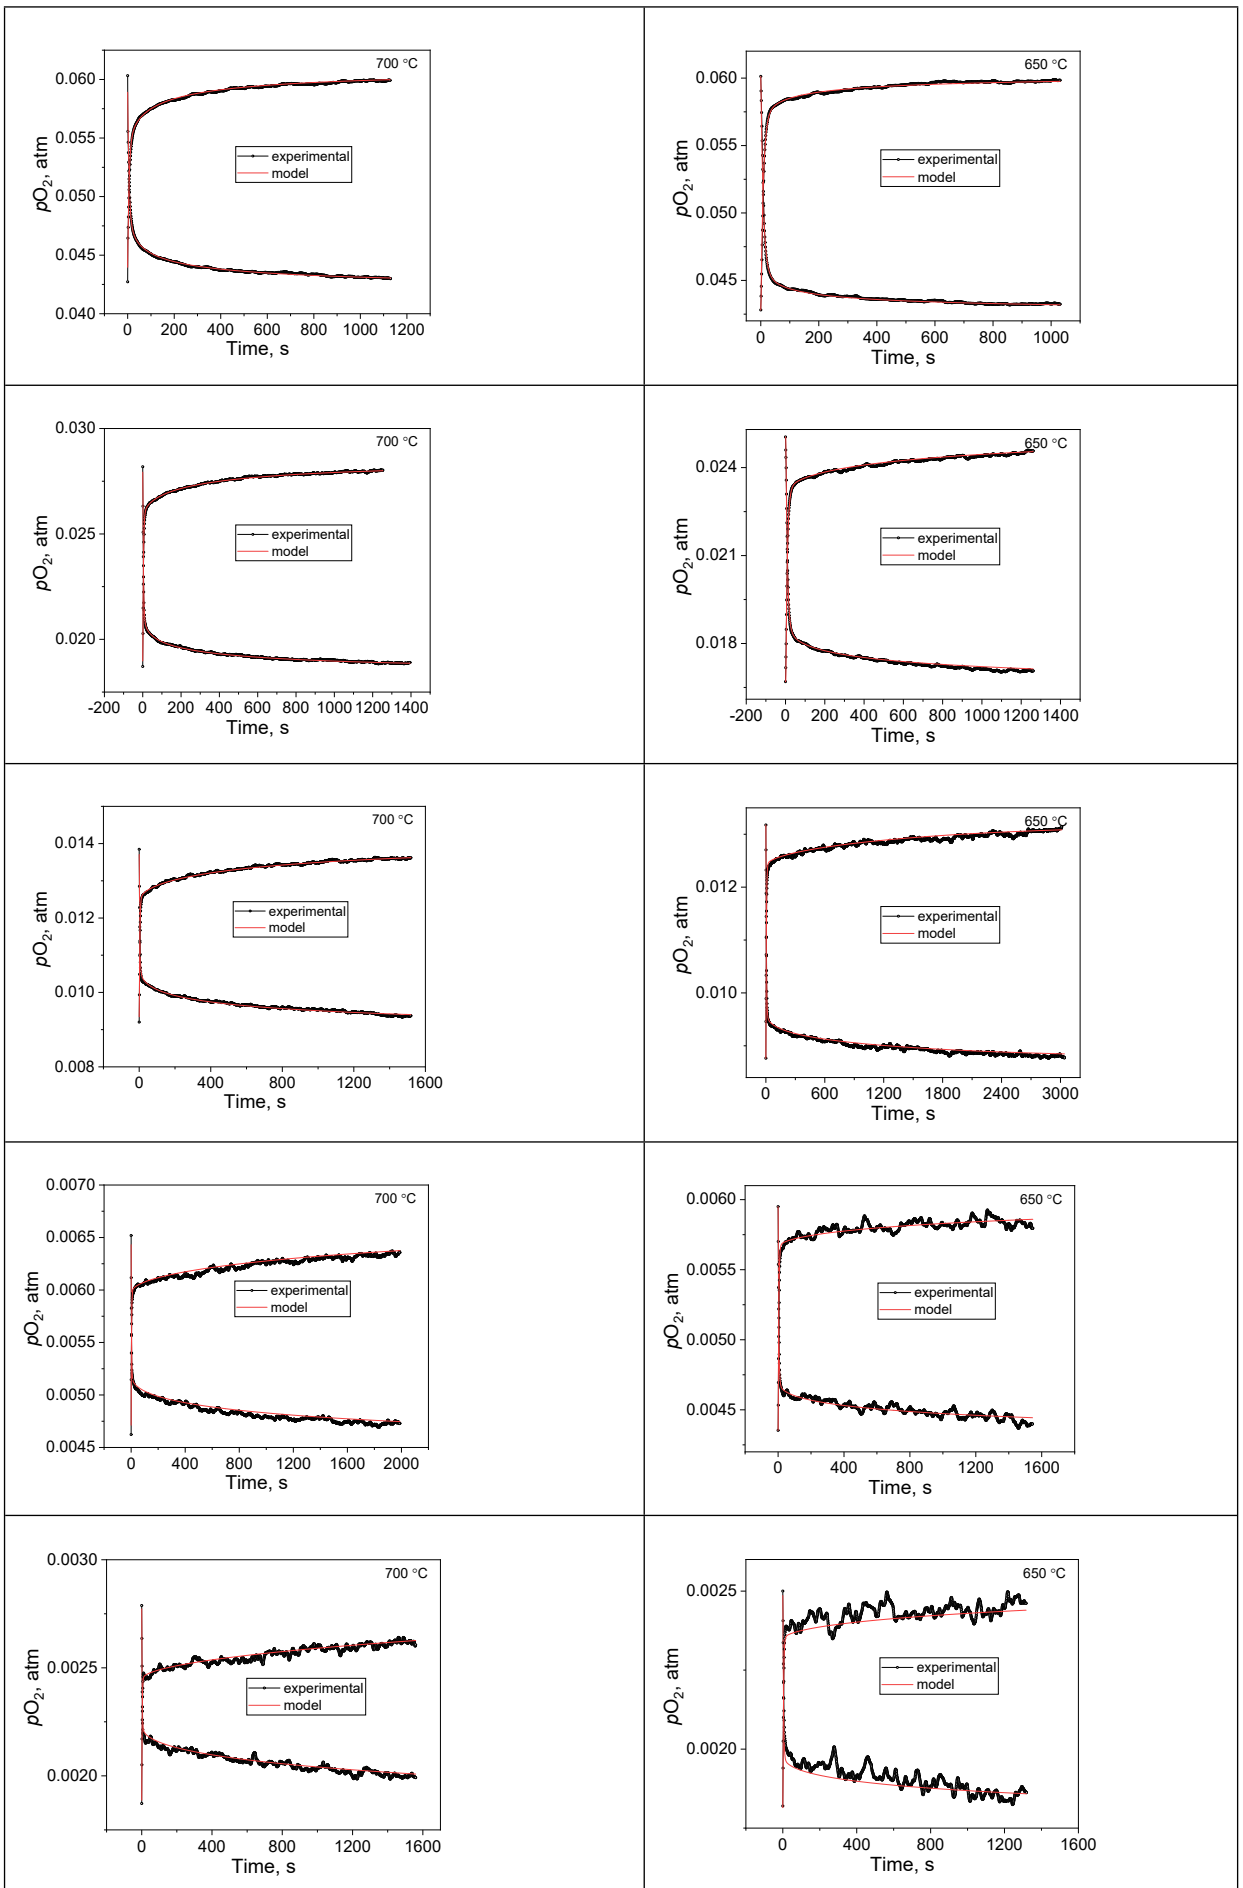

Fig S5 – Full OPFR experimental results with the Tanks-in-Series (TIS) approximation [26].
